# Supplementary material
Source: Springer Nature journal article supplement (https://www.springermedizin.de/resource/supplementary/12986_2005_35_MOESM5_ESM.pdf/25655226)

# Urinary Calcium

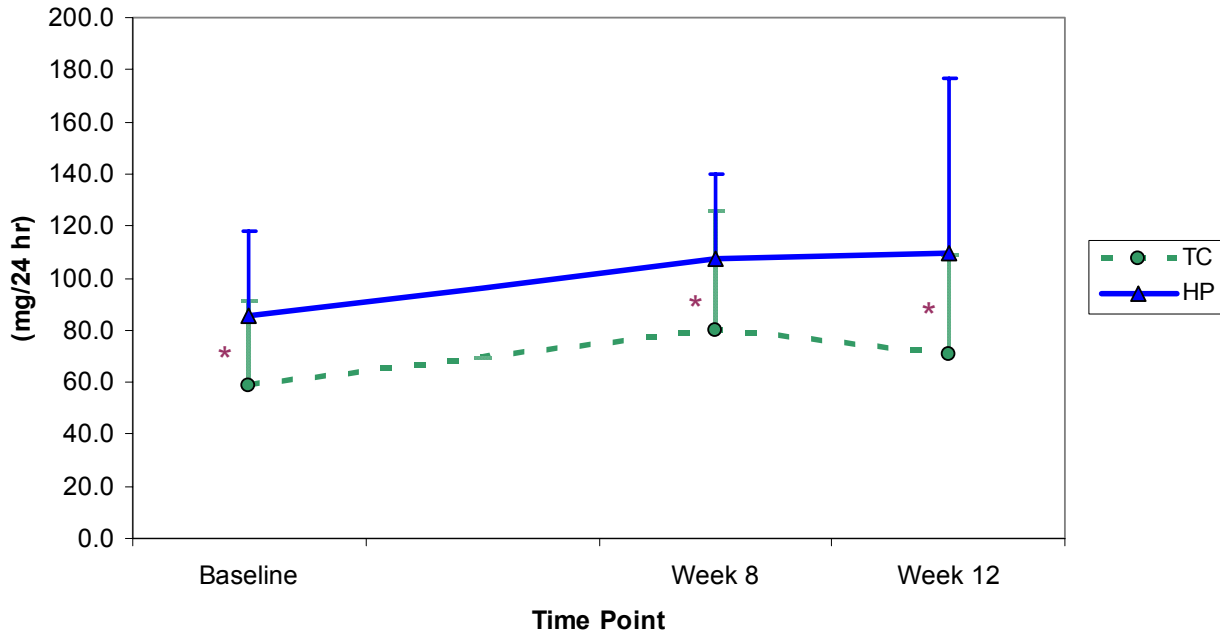

Supplement: MOESM5 [file 25655226]
